# Supplementary material
Source: PubMed Central journal article supplement (PMC3740072)

eFigure 1. PROMMTT CONSORT diagram

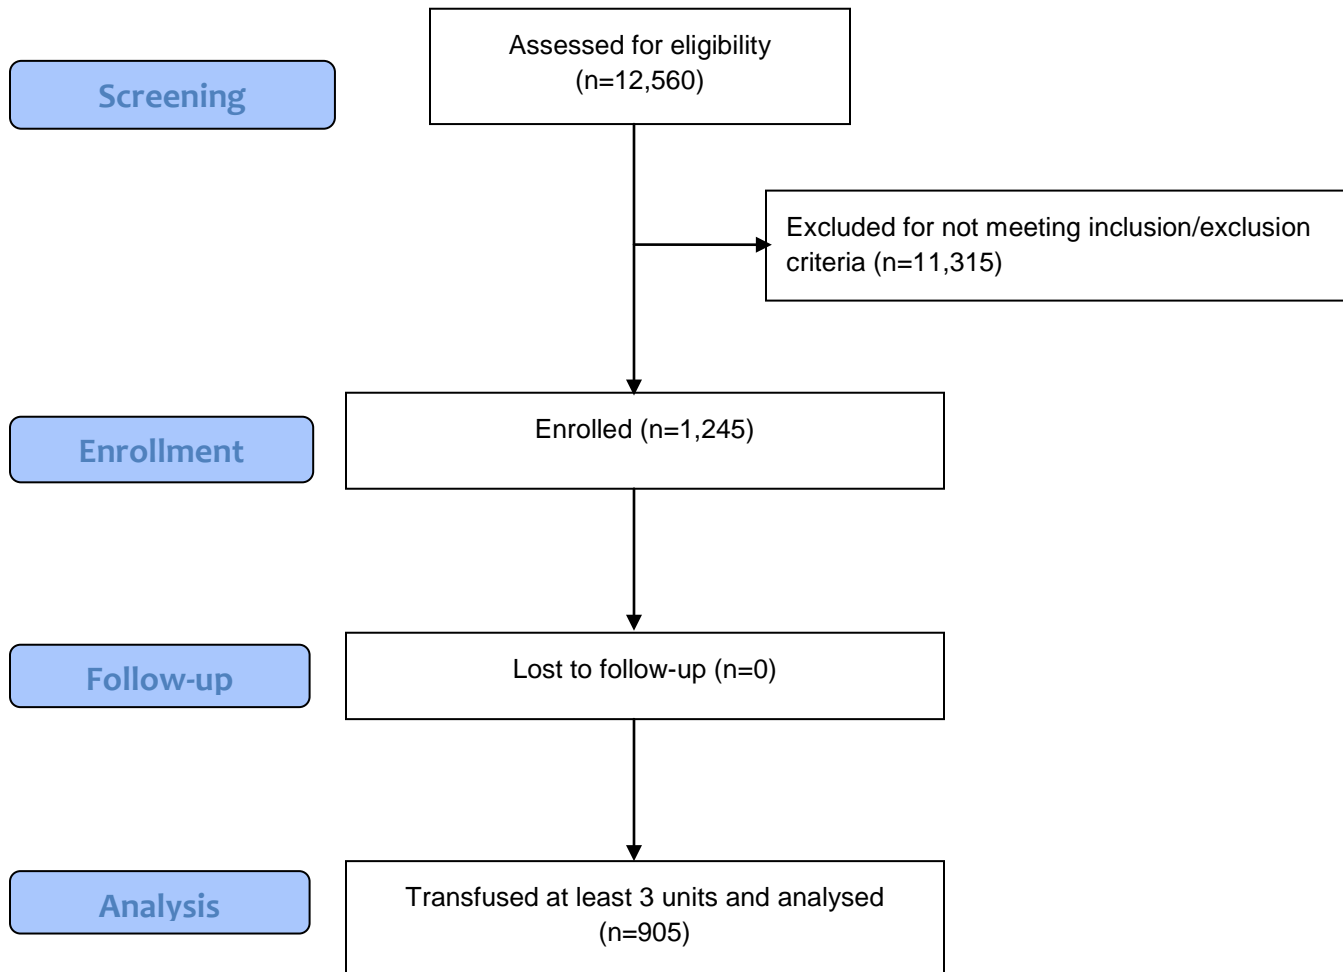

Supplement: NIHMS462781-supplement-1.pdf [file NIHMS462781-supplement-1.pdf]
